# Supplementary material
Source: publisher figshare collection journal article supplement (https://sage.figshare.com/ndownloader/files/36009518)
Supplement: Supplementary file 1 [file 36009518]

| **Sex: Male** | | **Total Instances Observed** | | | **Incidence Range** | | |
| --- | --- | --- | --- | --- | --- | --- | --- |
| **Tissue** | **Observation** | **Cambodian** | **Chinese** | **Vietnamese** | **Cambodian** | **Chinese** | **Vietnamese** |
| Larynx | Degeneration/Necrosis | - | 1 (0.22%), N=449 | - | - | [0-25.00%] | - |
| Erosion/Ulcer | - | 1 (0.22%), N=449 | 1 (1.25%), N=80 | - | [0-16.67%] | [0-16.67%] |
| Infiltrate, (Mononuclear Cell) | 3 (1.94%), N=155 | 11 (2.45%), N=449 | - | [0-50.00%] | [0-100.00%] | - |
| Inflammation | - | 7 (1.56%), N=449 | 1 (1.25%), N=80 | - | [0-50.00%] | [0-20.00%] |
| Metaplasia | - | 1 (0.22%), N=449 | - | - | [0-25.00%] | - |
| Pigment | - | 1 (0.22%), N=449 | - | - | [0-16.67%] | - |
| Lung | Adhesion/Inflammation/Fibrosis | 2 (0.86%), N=233 | 9 (1.41%), N=637 | 2 (2.02%), N=99 | [0-33.33%] | [0-25.00%] | [0-20.00%] |
| Alveolar Macrophages, Increased | 16a*, b* (6.87%), N=233 | 24a* (3.77%), N=637 | 2b* (2.02%), N=99 | [0-66.67%] | [0-83.33%] | [0-40.00%] |
| Congestion | 1 (0.43%), N=233 | 1 (0.16%), N=637 | - | [0-33.33%] | [0-20.00%] | - |
| Edema | 2 (0.86%), N=233 | 4 (0.63%), N=637 | - | [0-25.00%] | [0-33.33%] | - |
| Fibrosis | 1 (0.43%), N=233 | 1 (0.16%), N=637 | - | [0-16.67%] | [0-16.67%] | - |
| Foreign Material | 1 (0.43%), N=233 | 4 (0.63%), N=637 | - | [0-20.00%] | [0-40.00%] | - |
| Granuloma | 4 (1.72%), N=233 | 8 (1.26%), N=637 | - | [0-33.33%] | [0-25.00%] | - |
| Hemorrhage | 2 (0.86%), N=233 | 4 (0.63%), N=637 | - | [0-25.00%] | [0-33.33%] | - |
| Hypertrophy | 1 (0.43%), N=233 | - | - | [0-33.33%] | - | - |
| Infiltrate, (Mononuclear Cell) | 9 (3.86%), N=233 | 32 (5.02%), N=637 | 3 (3.03%), N=99 | [0-33.33%] | [0-100.00%] | [0-20.00%] |
| Inflammation (Eosinophils) | - | 1 (0.16%), N=637 | - | - | [0-14.29%] | - |
| Inflammation | 21 (9.01%), N=233 | 32 (5.02%), N=637 | 4 (4.04%), N=99 | [0-80.00%] | [0-66.67%] | [0-33.33%] |
| Multinucleated Giant Cell | - | 1 (0.16%), N=637 | - | - | [0-16.67%] | - |
| Pigment | - | 20 (3.14%), N=637 | 5 (5.05%), N=99 | - | [0-66.67%] | [0-60.00%] |
| Thrombus | - | 1 (0.16%), N=637 | - | - | [0-20.00%] | - |
| Trachea | Atrophy | 1 (0.45%), N=223 | - | - | [0-16.67%] | - | - |
| Erosion/Ulcer | - | 1 (0.17%), N=590 | - | - | [0-25.00%] | - |
| Infiltrate, (Eosinophils) | - | - | 1 (1.02%), N=98 | - | - | [0-11.11%] |
| Infiltrate, (Mononuclear Cell) | 9 (4.04%), N=223 | 23 (3.9%), N=590 | 7 (7.14%), N=98 | [0-66.67%] | [0-60.00%] | [0-50.00%] |
| Inflammation | 2 (0.9%), N=223 | 4 (0.68%), N=590 | 2 (2.04%), N=98 | [0-40.00%] | [0-25.00%] | [0-33.33%] |
| Metaplasia | - | 6 (1.02%), N=590 | - | - | [0-50.00%] | - |
| Regeneration | - | 2 (0.34%), N=590 | - | - | [0-20.00%] | - |

| **Sex: Female** | | **Total Instances Observed** | | | **Incidence Range** | | |
| --- | --- | --- | --- | --- | --- | --- | --- |
| **Tissue** | **Observation** | **Cambodian** | **Chinese** | **Vietnamese** | **Cambodian** | **Chinese** | **Vietnamese** |
| Larynx | Exudate | - | 1 (0.23%), N=442 | - | - | [0-16.67%] | - |
| Hemorrhage | 1 (0.69%), N=145 | 1 (0.23%), N=442 | - | [0-20.00%] | [0-16.67%] | - |
| Infiltrate, (Mononuclear Cell) | 3 (2.07%), N=145 | 11 (2.49%), N=442 | - | [0-75.00%] | [0-100.00%] | - |
| Inflammation | - | 3 (0.68%), N=442 | - | - | [0-33.33%] | - |
| Regeneration | - | 1 (0.23%), N=442 | - | - | [0-20.00%] | - |
| Lung | Accumulation | - | 1 (0.16%), N=637 | - | - | [0-20.00%] | - |
| Adhesion/Inflammation/Fibrosis | - | 14 (2.2%), N=637 | 1 (1%), N=100 | - | [0-40.00%] | [0-16.67%] |
| Alveolar Macrophages, Increased | 8 (3.67%), N=218 | 26 (4.08%), N=637 | 4 (4%), N=100 | [0-33.33%] | [0-100.00%] | [0-33.33%] |
| Congestion | 1 (0.46%), N=218 | 1 (0.16%), N=637 | - | [0-33.33%] | [0-20.00%] | - |
| Edema | 1 (0.46%), N=218 | 2 (0.31%), N=637 | - | [0-33.33%] | [0-16.67%] | - |
| Fibrosis | - | 2 (0.31%), N=637 | - | - | [0-20.00%] | - |
| Foreign Material | - | 4 (0.63%), N=637 | 2 (2%), N=100 | - | [0-33.33%] | [0-33.33%] |
| Granuloma | 1 (0.46%), N=218 | 5 (0.78%), N=637 | - | [0-20.00%] | [0-100.00%] | - |
| Hemorrhage | 1 (0.46%), N=218 | 6 (0.94%), N=637 | - | [0-20.00%] | [0-40.00%] | - |
| Hypertrophy/Hyperplasia | - | 1 (0.16%), N=637 | - | - | [0-25.00%] | - |
| Infiltrate, (Eosinophils) | - | 1 (0.16%), N=637 | - | - | [0-20.00%] | - |
| Infiltrate, (Mononuclear Cell) | 2a*, b* (0.92%), N=218 | 38a* (5.97%), N=637 | 2b* (2%), N=100 | [0-33.33%] | [0-100.00%] | [0-20.00%] |
| Inflammation | 9 (4.13%), N=218 | 32 (5.02%), N=637 | 3 (3%), N=100 | [0-60.00%] | [0-66.67%] | [0-33.33%] |
| Multinucleated Giant Cell | - | 2 (0.31%), N=637 | - | - | [0-20.00%] | - |
| Pigment | - | 22 (3.45%), N=637 | 1 (1%), N=100 | - | [0-83.33%] | [0-20.00%] |
| Thrombus | 1 (0.46%), N=218 | - | - | [0-12.50%] | - | - |
| Trachea | Hemorrhage | 1 (0.47%), N=214 | - | - | [0-20.00%] | - | - |
| Infiltrate, (Mononuclear Cell) | 10 (4.67%), N=214 | 22 (3.76%), N=585 | 4 (4.08%), N=98 | [0-100.00%] | [0-60.00%] | [0-25.00%] |
| Inflammation | 2 (0.93%), N=214 | 1 (0.17%), N=585 | - | [0-40.00%] | [0-11.11%] | - |
| Metaplasia | - | 3 (0.51%), N=585 | - | - | [0-25.00%] | - |
| Regeneration | - | 1 (0.17%), N=585 | - | - | [0-20.00%] | - |
